# Supplementary material
Source: PubMed Central journal article supplement (PMC9125448)
Supplement: sj-pdf-1-inc-10.1177_1751143720977280.pdf [file sj-pdf-1-inc-10.1177_1751143720977280.pdf]

| <b>Neurocognitive dysfunction tests. Comparison: pre-and post-op (day 3-5) outcomes.</b> |                   |                      |                 |
|------------------------------------------------------------------------------------------|-------------------|----------------------|-----------------|
| <b>MMSE</b>                                                                              |                   |                      |                 |
|                                                                                          | NIRS group (n=68) | Control group(n=59)  | <i>p</i> -value |
| No Neuro-dysfunction                                                                     | 67                | 57                   | 0.59            |
| Yes Neuro-dysfunction                                                                    | 1                 | 2                    |                 |
| <b>Trail A</b>                                                                           |                   |                      |                 |
|                                                                                          | NIRS group (n=66) | Control group(n=56)  | <i>p</i> -value |
| No Neuro-dysfunction                                                                     | 63                | 52                   | 0.70            |
| Yes Neuro-dysfunction                                                                    | 3                 | 4                    |                 |
| <b>Trail B</b>                                                                           |                   |                      |                 |
|                                                                                          | NIRS group (n=51) | Control group(n=44)  | <i>p</i> -value |
| No Neuro-dysfunction                                                                     | 46                | 41                   | 0.78            |
| Yes Neuro-dysfunction                                                                    | 5                 | 3                    |                 |
| <b>HADS-A</b>                                                                            |                   |                      |                 |
|                                                                                          | NIRS group (n=67) | Control group(n=58)  | <i>p</i> -value |
| No Neuro-dysfunction                                                                     | 63                | 58                   | 0.12            |
| Yes Neuro-dysfunction                                                                    | 4                 | 0                    |                 |
| <b>HADS-D</b>                                                                            |                   |                      |                 |
|                                                                                          | NIRS group (n=67) | Control group(n=58)  | <i>p</i> -value |
| No Neuro-dysfunction                                                                     | 64                | 56                   | 1.0             |
| Yes Neuro-dysfunction                                                                    | 3                 | 2                    |                 |
| <b>Anti-saccadic</b>                                                                     |                   |                      |                 |
|                                                                                          | NIRS group (n=62) | Control group(n=51)  | <i>p</i> -value |
| No Neuro-dysfunction                                                                     | 59                | 46                   | 0.46            |
| Yes Neuro-dysfunction                                                                    | 3                 | 5                    |                 |
| <b>Total Hopkins</b>                                                                     |                   |                      |                 |
|                                                                                          | NIRS group (n=60) | Control group(n=51)  | <i>p</i> -value |
| No Neuro-dysfunction                                                                     | 57                | 47                   | 0.70            |
| Yes Neuro-dysfunction                                                                    | 3                 | 4                    |                 |
| <b>Hopkins Delay</b>                                                                     |                   |                      |                 |
|                                                                                          | NIRS group (n=56) | Control group(n=49)  | <i>p</i> -value |
| No Neuro-dysfunction                                                                     | 52                | 49                   | 0.12            |
| Yes Neuro-dysfunction                                                                    | 4                 | 0                    |                 |
| <b>&gt;1 Abnormal Tests *</b>                                                            |                   |                      |                 |
|                                                                                          | NIRS group (n=62) | Control group (n=51) | <i>p</i> -value |
| Yes Neuro-dysfunction                                                                    | 2                 | 1                    | 1.0             |

**MMSE-minimal mental state examination;**

**\*number of patients in each group who failed more than one test.**
