# Supplementary material
Source: PubMed Central journal article supplement (PMC9125448)
Supplement: sj-pdf-2-inc-10.1177_1751143720977280.pdf [file sj-pdf-2-inc-10.1177_1751143720977280.pdf]

Supplementary File: 6 month telephone follow-up questionnaire and scoring for; General Life Style, Cognition, Functionality and Impact of study.

| 6 month post-operation telephone follow-up; general health, cognition and functionality                                                                                 |                                                                                      |                      |                            |                          |
|-------------------------------------------------------------------------------------------------------------------------------------------------------------------------|--------------------------------------------------------------------------------------|----------------------|----------------------------|--------------------------|
|                                                                                                                                                                         |                                                                                      | NIRS group<br>(n=74) | Control<br>group<br>(n=66) | p-value<br>± significant |
| <b>General Life style:</b>                                                                                                                                              |                                                                                      |                      |                            |                          |
| Compared to before the surgery, how do you rate your overall <b>health</b> ?                                                                                            |                                                                                      |                      |                            |                          |
|                                                                                                                                                                         | Better (5)<br>No different (3)<br>Worse (1)                                          |                      |                            |                          |
| Compared to before the surgery, how do you rate your overall <b>memory</b> ?                                                                                            |                                                                                      |                      |                            |                          |
|                                                                                                                                                                         | Better (5)<br>No different (3)<br>Worse (1)                                          |                      |                            |                          |
| Compared to before the surgery, how do you rate your overall <b>mood</b> ?                                                                                              |                                                                                      |                      |                            |                          |
|                                                                                                                                                                         | Better (5)<br>No different (3)<br>Worse (1)                                          |                      |                            |                          |
| <b>Overall score (Max 15)</b>                                                                                                                                           | <b>Better (&gt;9)</b>                                                                | <b>42</b>            | <b>30</b>                  | <b>0.207</b>             |
|                                                                                                                                                                         | <b>No different (9)</b>                                                              | <b>16</b>            | <b>18</b>                  |                          |
|                                                                                                                                                                         | <b>Worse (&lt;9)</b>                                                                 | <b>16</b>            | <b>18</b>                  |                          |
| <b>Cognition (Adapted questions from Mini Mental State Examination for telephone assessment):</b>                                                                       |                                                                                      |                      |                            |                          |
| Can you state the full date today? (Year, Month, Day)                                                                                                                   |                                                                                      |                      |                            |                          |
|                                                                                                                                                                         | All three correct (3)<br>Two correct (2)<br>One correct (1)<br>None correct (0)      |                      |                            |                          |
| We will ask you to remember a sentence for immediate recall and then again later on. Can you please repeat this sentence "the <b>balloons</b> are <b>flying high</b> "? |                                                                                      |                      |                            |                          |
|                                                                                                                                                                         | Correctly repeated (3)<br>Two key words (2)<br>One key word (1)<br>None correct      |                      |                            |                          |
| Please start at 100 and subtract 7 and repeat this five times? (100,93,86,79,72,65)                                                                                     |                                                                                      |                      |                            |                          |
|                                                                                                                                                                         | All five correct (3)<br>3 or 4 correct (2)<br>1 or 2 correct (1)<br>None correct (0) |                      |                            |                          |
| Please spell the word "WORLD" backwards. (D, L, R, O, W)                                                                                                                |                                                                                      |                      |                            |                          |
|                                                                                                                                                                         | All five correct (3)<br>3 or 4 correct (2)<br>1 or 2 correct (1)<br>None correct (0) |                      |                            |                          |
| Can you recall the sentence from earlier? (the <b>balloons</b> are <b>flying high</b> )                                                                                 |                                                                                      |                      |                            |                          |

|                                                                                     |                                                                                 |                        |                        |                |
|-------------------------------------------------------------------------------------|---------------------------------------------------------------------------------|------------------------|------------------------|----------------|
|                                                                                     | Correctly repeated (3)<br>Two key words (2)<br>One key word (1)<br>None correct |                        |                        |                |
| <b>TOTAL<br/>(max 15)</b>                                                           | <b>Mean (SD)</b>                                                                | <b>13 (1.8)</b>        | <b>12(1.9)</b>         | <b>0.841</b>   |
| Functionality:                                                                      |                                                                                 |                        |                        |                |
| Compared to how you managed prior to surgery, how are you managing <b>stairs</b> ?  |                                                                                 |                        |                        |                |
|                                                                                     | Better (3)<br>No difference (2)<br>Worse (1)                                    |                        |                        |                |
| Compared to how you managed before surgery, how are you managing <b>driving</b> ?   |                                                                                 |                        |                        |                |
|                                                                                     | Better (3)<br>No difference (2)<br>Worse (1)                                    |                        |                        |                |
| Compared to how you managed before surgery, how are you managing <b>cleaning</b> ?  |                                                                                 |                        |                        |                |
|                                                                                     | Better (3)<br>No difference (2)<br>Worse (1)                                    |                        |                        |                |
| Compared to how you managed before surgery, how are you managing <b>dressings</b> ? |                                                                                 |                        |                        |                |
|                                                                                     | Better (3)<br>No difference (2)<br>Worse (1)                                    |                        |                        |                |
| Compared to how you managed prior to surgery, how are you managing <b>cooking</b> ? |                                                                                 |                        |                        |                |
|                                                                                     | Better (3)<br>No difference (2)<br>Worse (1)                                    |                        |                        |                |
| <b>TOTAL<br/>(Maximum<br/>15)</b>                                                   | <b>Better (&gt;10)<br/>No different (10)<br/>Worse (&lt;10)</b>                 | <b>15<br/>51<br/>8</b> | <b>9<br/>38<br/>19</b> | <b>0.016 †</b> |
| Perceived study impact:                                                             |                                                                                 |                        |                        |                |
| Did being in this study make the experience: better, no different or worse?         |                                                                                 |                        |                        |                |
|                                                                                     | <b>Better<br/>No difference<br/>Worse</b>                                       | <b>25<br/>48<br/>1</b> | <b>20<br/>46<br/>0</b> | <b>0.751</b>   |
