# Supplementary material
Source: PubMed Central journal article supplement (PMC9125448)
Supplement: sj-pdf-3-inc-10.1177_1751143720977280.pdf [file sj-pdf-3-inc-10.1177_1751143720977280.pdf]

| <b>Supplementary Cardiopulmonary Bypass data</b>                |                                     |                                     |                                 |
|-----------------------------------------------------------------|-------------------------------------|-------------------------------------|---------------------------------|
| <b>VARIABLE</b>                                                 | <b>NIRS Group<br/>n=91</b>          | <b>Control Group<br/>n=91</b>       | <b>p-value<br/>‡significant</b> |
| <b>Cardiopulmonary Bypass time, (%)</b><br><80 mins<br>>80 mins | 66 (47.8)<br>25 (56.8)              | 72 (52.2)<br>19 (43.2)              | 0.299                           |
| <b>Cumulative Cross Clamp Time (%)</b><br>≤60 mins<br>>60 mins  | 52 (46)<br>39 (56.5)                | 61 (54)<br>30 (43.5)                | 0.169                           |
| <b>Lowest Core Temp °C (%)</b><br>≤32<br>>32                    | 47 (54.7)<br>44 (45.8)              | 39 (45.3)<br>52 (54.2)              | 0.235                           |
| <b>Lowest Hb g/dl (%)</b><br>≤80<br>81-100<br>>101              | 13 (48.1)<br>32 (46.4)<br>46 (53.1) | 14 (51.9)<br>37 (53.6)<br>40 (46.5) | 0.664                           |

‡ Using Chi-square test with 95% confidence interval
